# Supplementary material
Source: Springer Nature journal article supplement (https://www.springermedizin.de/resource/supplementary/12990_2009_231_MOESM4_ESM.pdf/9612846)

Sham

GP120

GP120+ddC

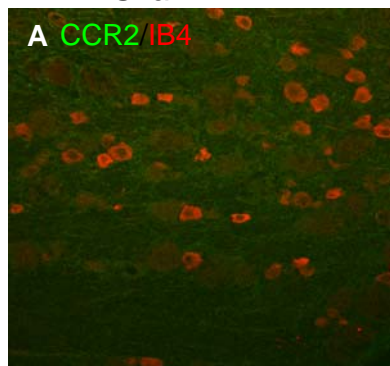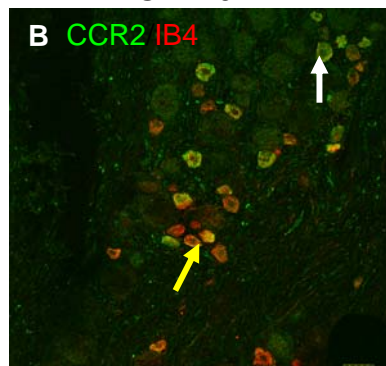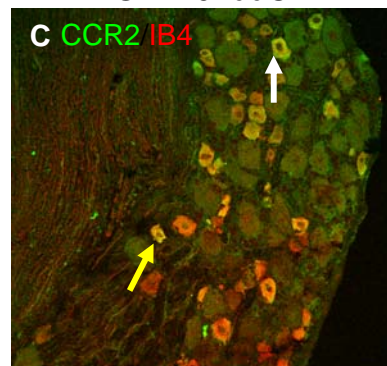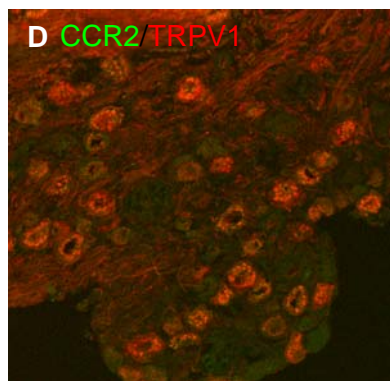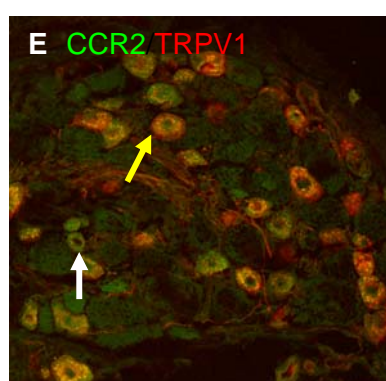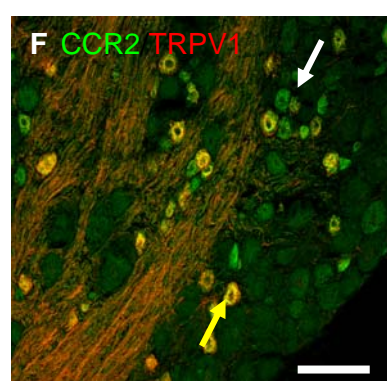

### G Cellular characterization of the CCR2 receptor after injuries

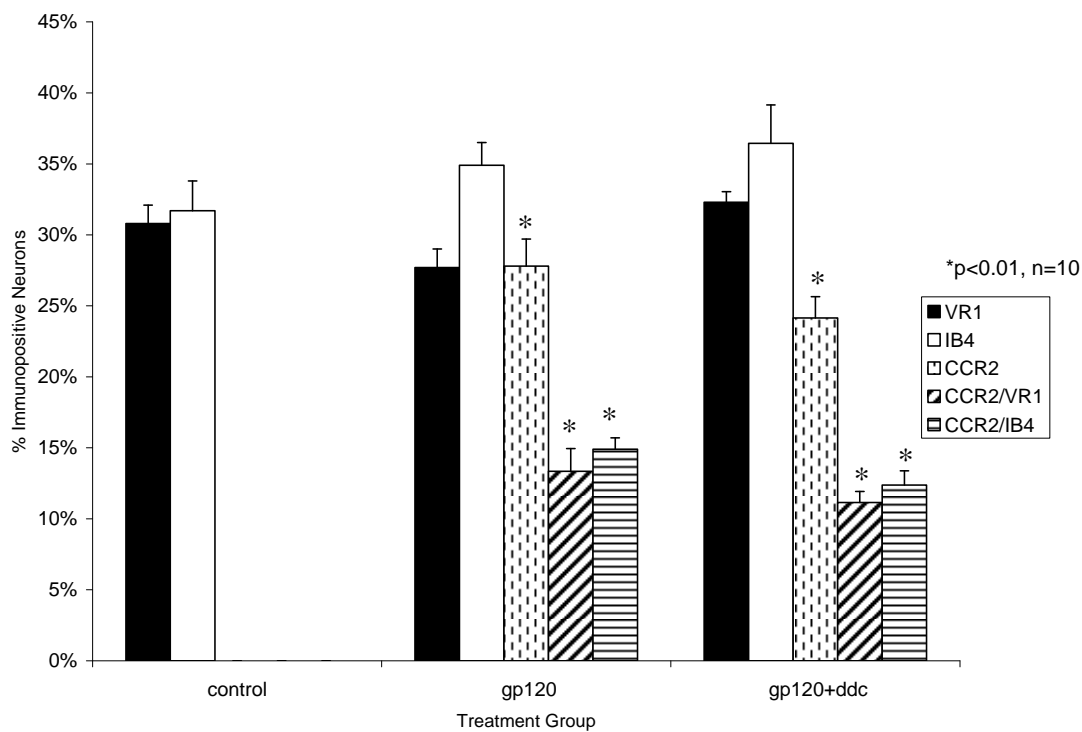

Supplement: MOESM4 [file 9612846]
